# Supplementary material for: Mechanistic insight into spontaneous transition from cellular alternans to arrhythmia—A simulation study
Source: PubMed Central journal article supplement (PMC6291170; doi:10.1371/journal.pcbi.1006594), 2018-11-30
Supplement: pcbi.1006594.s002.pdf [file pcbi.1006594.s002.pdf]

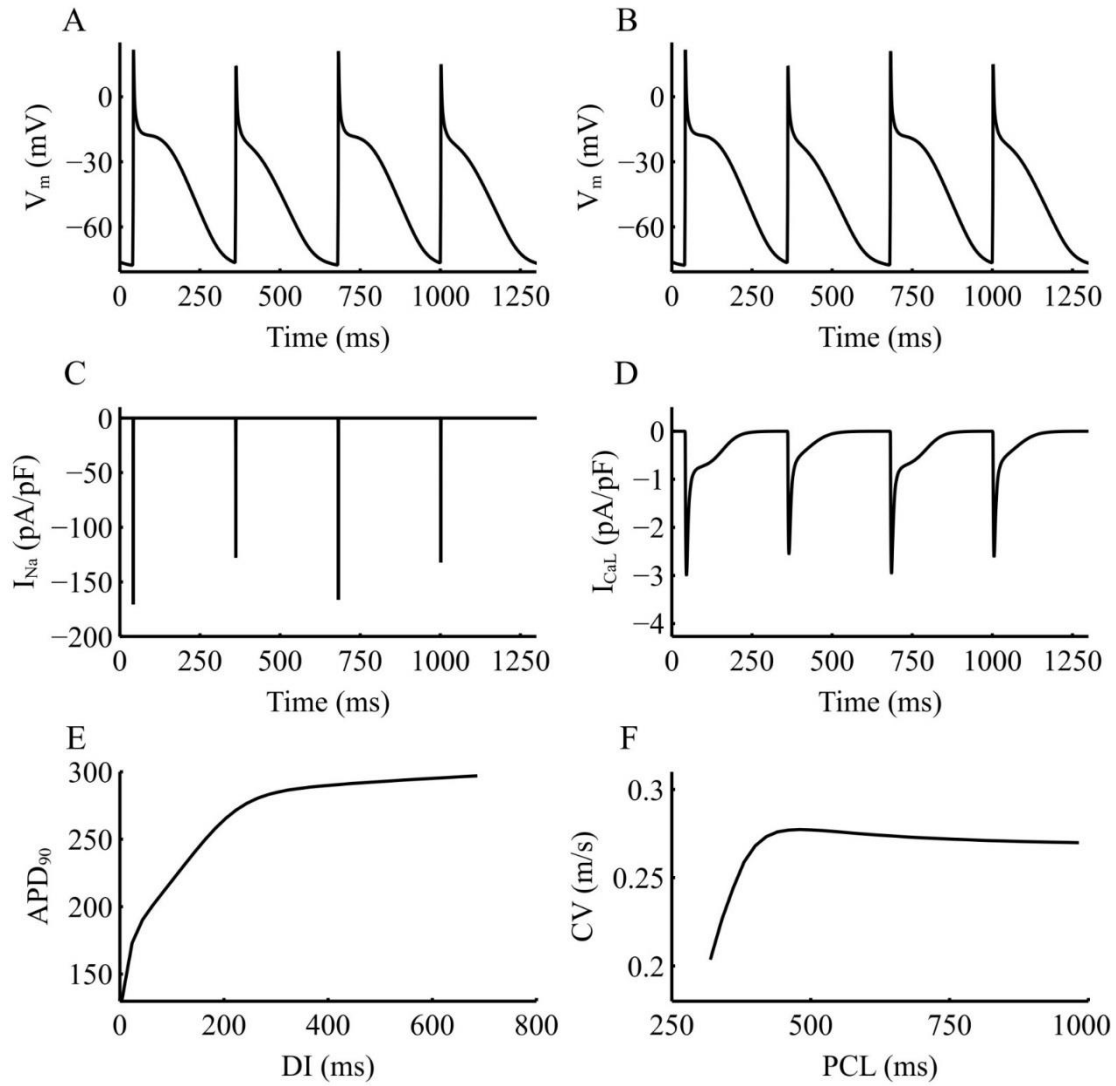

Fig S3.1 Cellular model properties of CRN model. (A-B) Representative AP alternans generated CRN model at PCL = 320ms. (C) Recorded  $I_{Na}$  current traces during AP alternans. (D) Recorded  $I_{CaL}$  current traces during AP alternans. (E) APD<sub>90</sub> restitution curves using S1-S2 protocol of the single cell models. (F) CV restitution curve computed by using the S1-S2 protocol.
