# Supplementary material for: Mechanistic insight into spontaneous transition from cellular alternans to arrhythmia—A simulation study
Source: PubMed Central journal article supplement (PMC6291170; doi:10.1371/journal.pcbi.1006594), 2018-11-30
Supplement: pcbi.1006594.s006.pdf [file pcbi.1006594.s006.pdf]

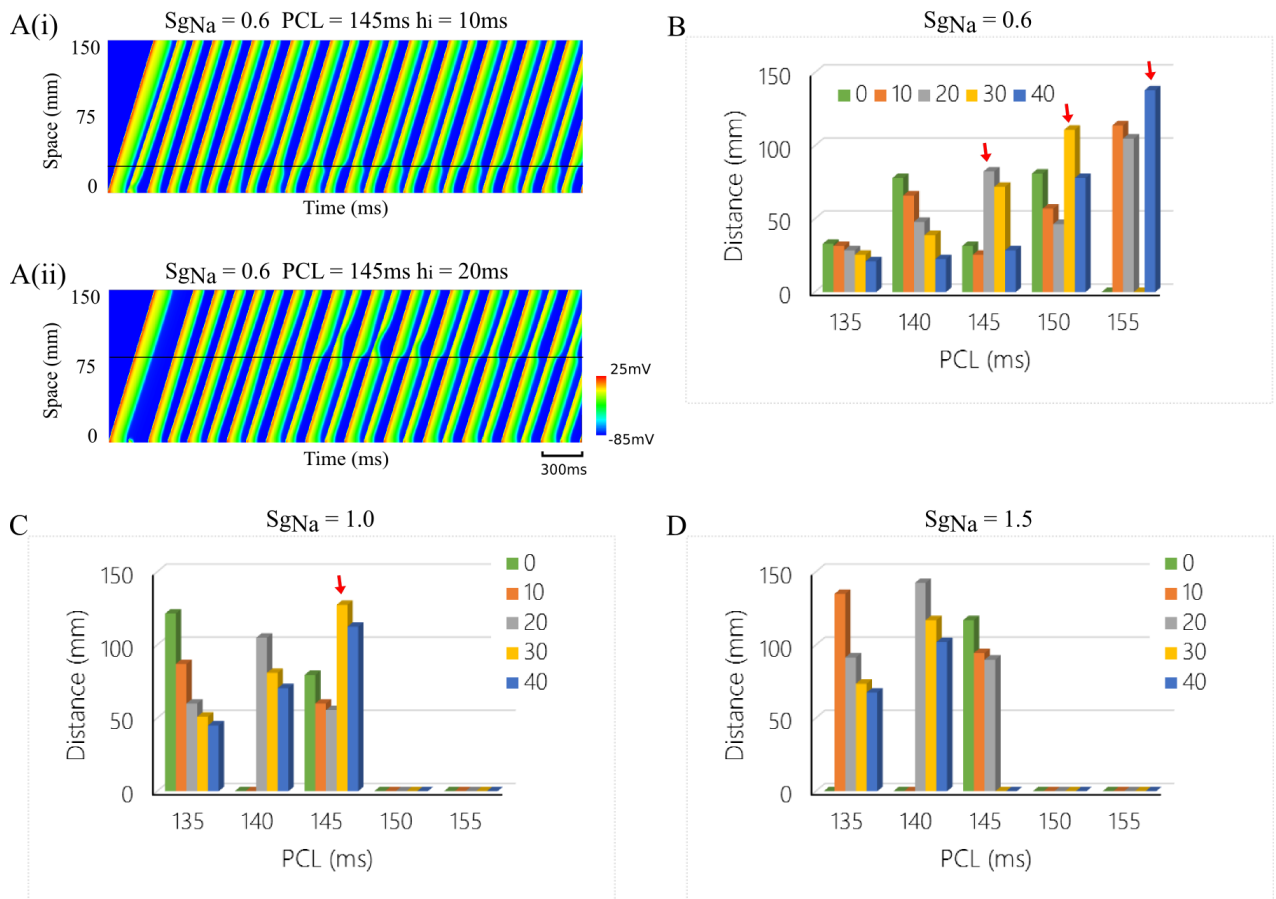

Fig S4 Role of  $I_{Na}$  recovery time in the location of APD node. (A) Representative 1D space-time results with  $S_{gNa}=0.6$ , PCL = 145ms,  $h_i=10$ ms (i) and 20ms (ii). (B) Statistic APD node distances from stimulation site at different recovery time prolongations and PCLs with reduced  $I_{Na}$ . (C) Statistic APD node distances from stimulation site at different recovery time prolongations and PCLs with normal  $I_{Na}$ . (D) Statistic APD node distances from stimulation site at different recovery time prolongations and PCLs with increased  $I_{Na}$ . Red arrow marked the APD node relocated conditions.
